# Supplementary material for: Long-term safety and effectiveness of adalimumab in 462 patients with intestinal Behçet’s disease: results from a large real-world observational study
Source: PubMed Central journal article supplement — Intest Res. 2020 Aug 21;19(3):301–12. doi: 10.5217/ir.2020.00013 (PMC8322033; doi:10.5217/ir.2020.00013), 2020-08-21
Supplement: ir-2020-00013-suppl.pdf [file ir-2020-00013-suppl.pdf]

See “Long-term safety and effectiveness of adalimumab in 462 patients with intestinal Behçet’s disease: results from a large real-world observational study” on page 301-312.

**Supplementary Table 1.** Baseline Patient Factors Considered to Affect the Incidence of ADRs

| Baseline factor                   | Odds ratio | 95% CI      |
|-----------------------------------|------------|-------------|
| Age (yr)                          |            |             |
| < 15                              | 0.3752     | 0.037–3.830 |
| 15 to < 65 (control group)        | -          | -           |
| ≥ 65                              | 0.9165     | 0.414–2.029 |
| Sex                               |            |             |
| Male (control group)              | -          | -           |
| Female                            | 1.0132     | 0.561–1.831 |
| Disease duration (yr)             |            |             |
| < 2 (control group)               | -          | -           |
| 2 to < 5                          | 1.0933     | 0.517–2.311 |
| 5 to < 10                         | 1.0491     | 0.471–2.339 |
| ≥ 10                              | 1.1363     | 0.559–2.311 |
| Comorbidity                       |            |             |
| No                                | 0.4056     | 0.226–0.729 |
| Yes (control group)               | -          | -           |
| Past medical history              |            |             |
| No (control group)                | -          | -           |
| Yes                               | 1.3918     | 0.752–2.575 |
| History of allergy                |            |             |
| No (control group)                | -          | -           |
| Yes                               | 1.0109     | 0.515–1.986 |
| History of smoking                |            |             |
| No (control group)                | -          | -           |
| Yes                               | 1.0321     | 0.536–1.988 |
| Self-administration of adalimumab |            |             |
| No                                | 1.8897     | 1.011–3.532 |
| Yes (control group)               | -          | -           |

(Continued to the next)

**Supplementary Table 1.** Continued

| Baseline factor                           | Odds ratio | 95% CI      |
|-------------------------------------------|------------|-------------|
| Previous use of infliximab                |            |             |
| No (control group)                        | -          | -           |
| Yes                                       | 1.7447     | 0.876–3.474 |
| Concomitant use of immunomodulators       |            |             |
| No (control group)                        | -          | -           |
| Yes                                       | 1.1247     | 0.639–1.980 |
| Concomitant use of corticosteroid         |            |             |
| No                                        | 0.5183     | 0.292–0.921 |
| Yes (control group)                       | -          | -           |
| Diagnostic categories of Behçet’s disease |            |             |
| Incomplete type (control group)           | -          | -           |
| Complete type                             | 1.1078     | 0.291–4.218 |
| Suspected                                 | 1.1260     | 0.634–2.000 |
| Others                                    | 0.6313     | 0.153–2.611 |

ADR, adverse drug reaction; CI, confidence interval.
